# Supplementary material for: Accurate Elucidation of Oxidation Under Heavy Ozone Pollution: A Full Suite of Radical Measurement In the Chemical-complex Atmosphere
Source: Copernicus journal article supplement (doi:10.5194/egusphere-2024-2494), 2024-08-30
Supplement: Supplementary file 1 [file egusphere-2024-2494-supplement.pdf]

# Supplements

## Figures in supplementary material

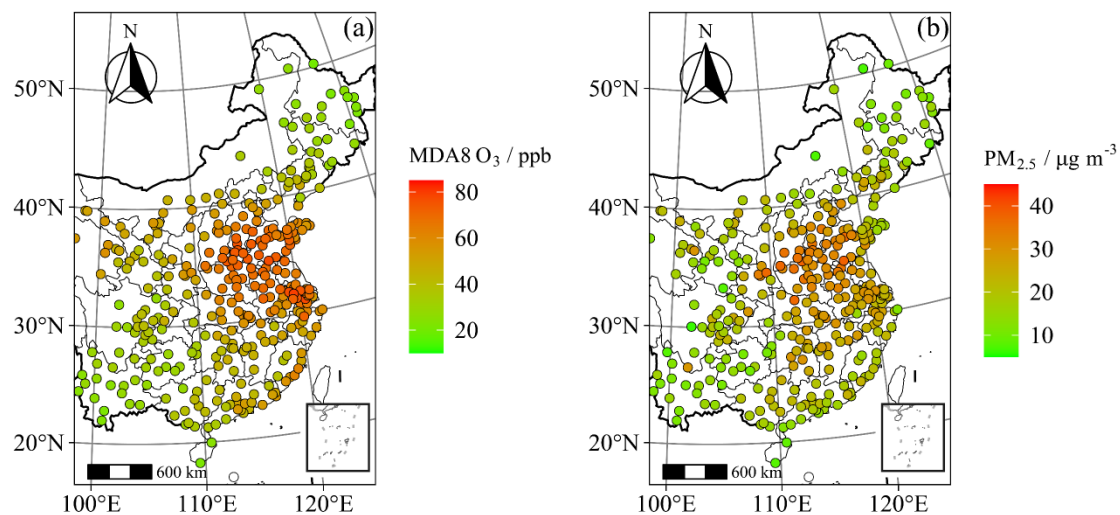

**Fig. S1.** (a) The daily maximum 8-hour average ozone (MDA8) and (b) daily average PM<sub>2.5</sub> in September 2020 at individual cities of the surface network operated by the China MEE. The data points are averages over the entire observation period (0901-0920).

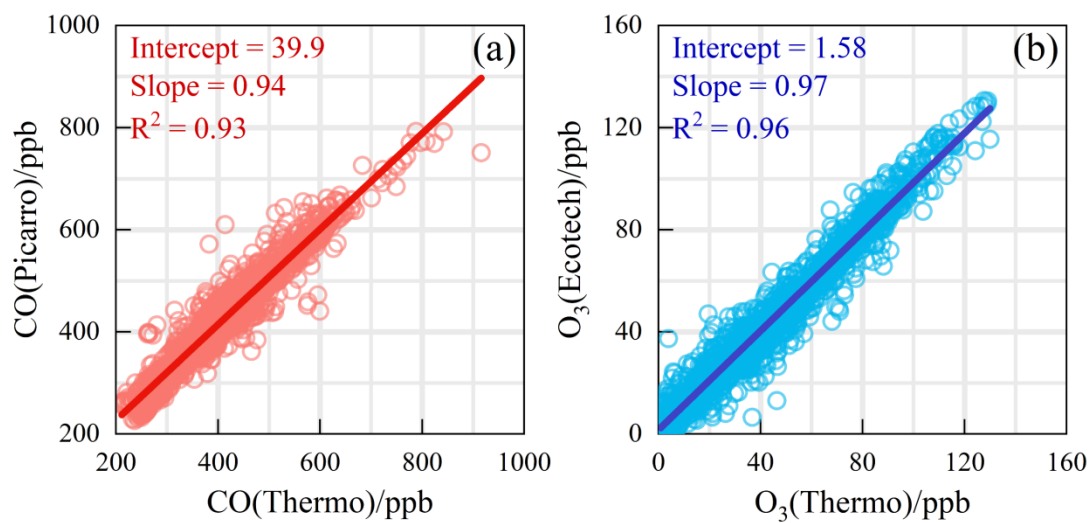

**Fig. S2.** The comparison results between different technologies. (a) CO measurements by Thermo 48i and Picarro-G2401. (b) O<sub>3</sub> measurements by Thermo 49i and Ecotech EC9810B.

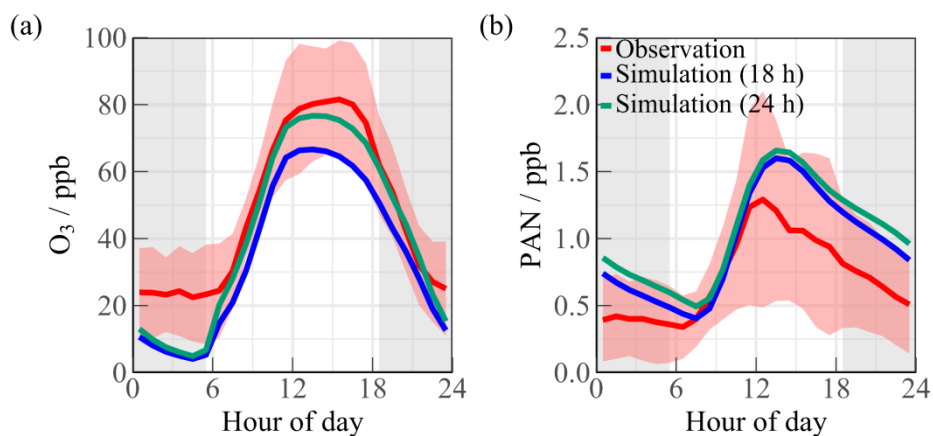

**Fig. S3.** The comparison results of (a) ozone and (b) PAN between simulation and observation.

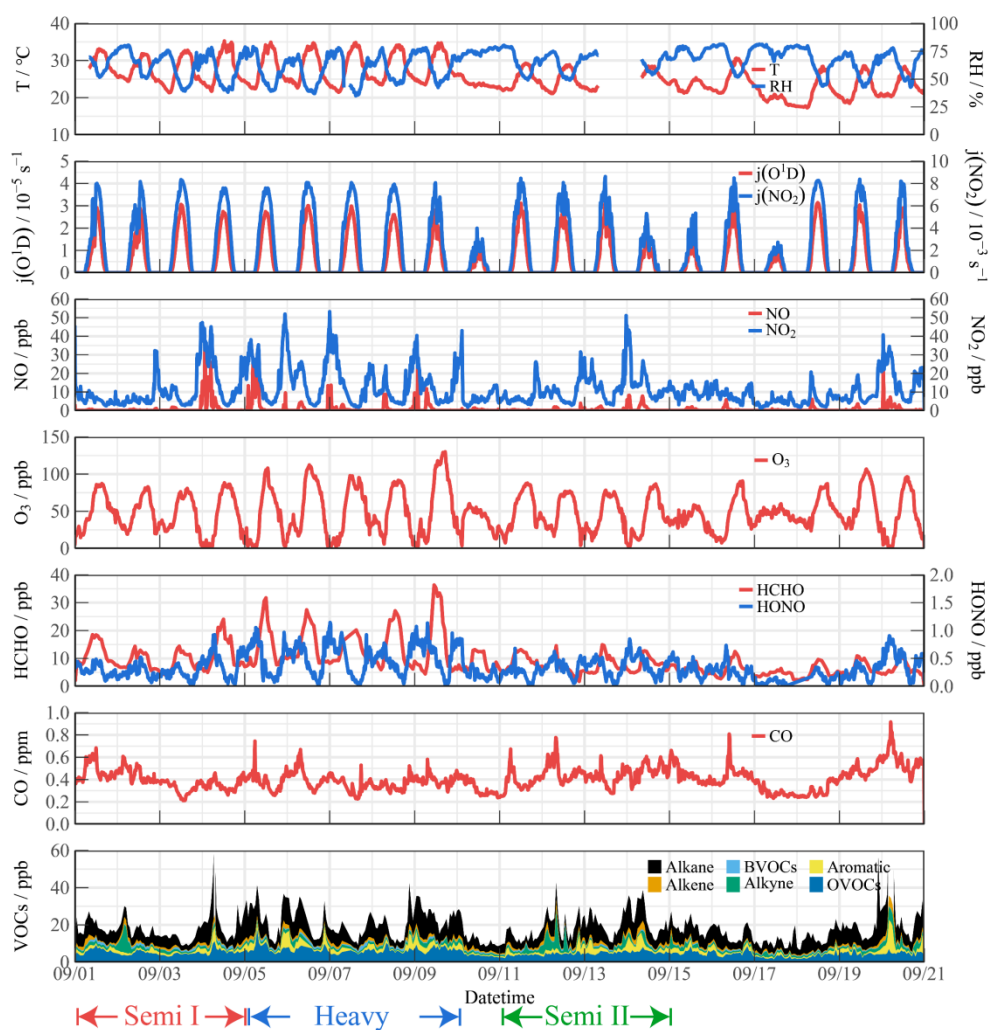

**Fig. S4.** Time series of observed meteorological and chemical parameters during the campaign. The entire ozone pollution is divided into three continuous periods according to pollution level (Semi I, Heavy, and Semi II).

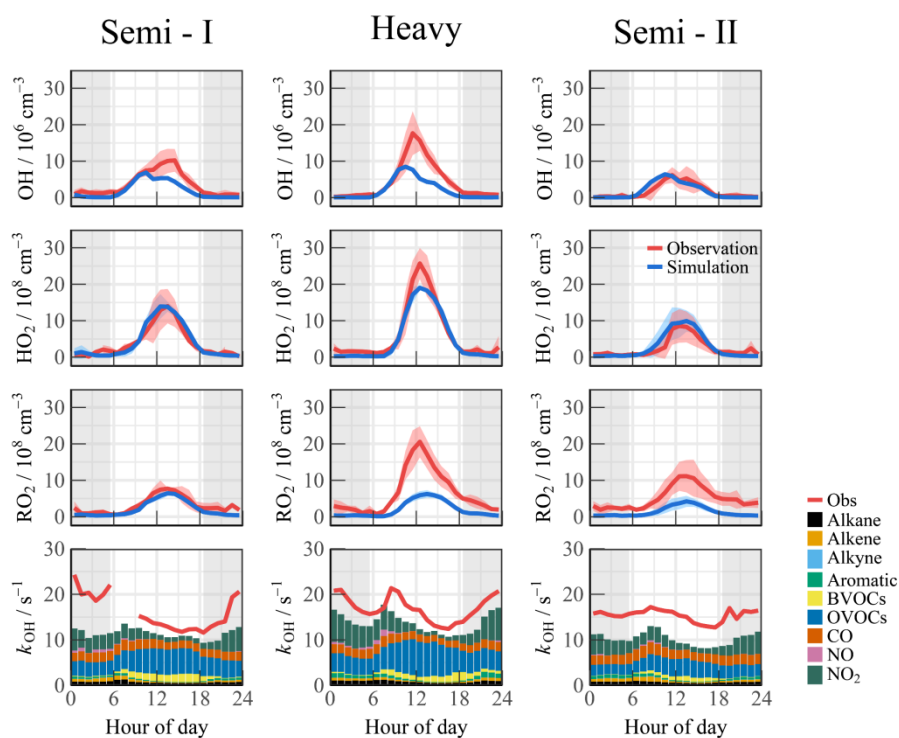

**Fig. S5.** Diurnal profiles of the observed and modelled OH, HO<sub>2</sub>, RO<sub>2</sub> and  $k_{OH}$  in different episodes (Semi I, Heavy, and Semi II). The coloured shadows denote the 25 and 75% percentiles. The grey areas denote nighttime.

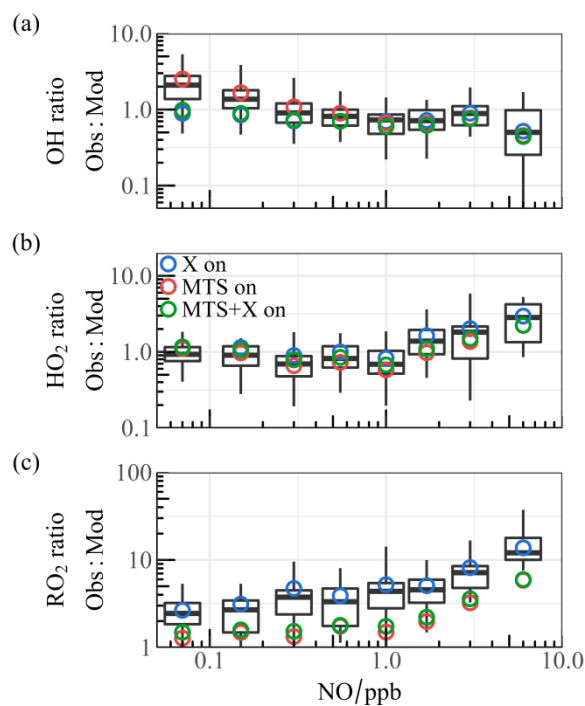

**Fig. S6.** The relationship between NO and the “observation-to-simulation” ratios for (a) OH, (b) HO<sub>2</sub>, and (c) RO<sub>2</sub> concentrations. Boxplot diagrams illustrate the dataset’s minimum, 25th percentile, median, 75th percentile, and maximum values. The circles represent median values by different mechanisms added to the base model within various ranges.

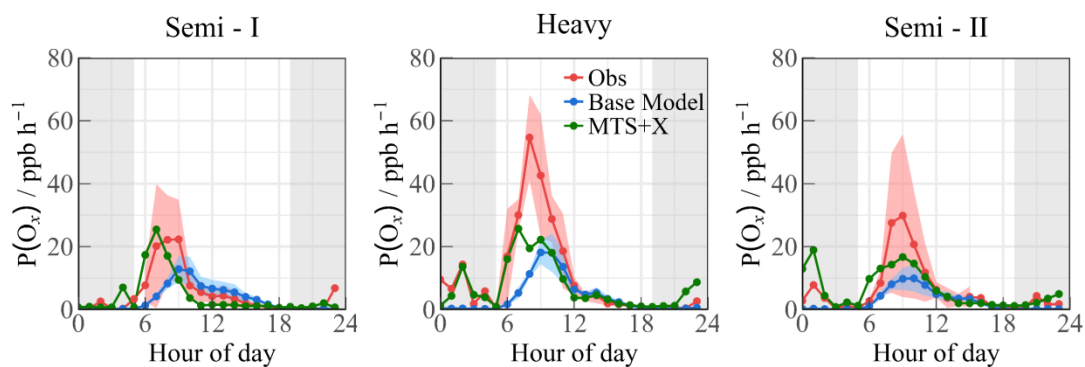

**Fig. S7.** The  $P(O_x)$  values that calculated by different radical values (Scenario 1: by the observed values; Scenario 2: by the base model values. Scenario 3: by both considering X mechanism and the influence of monoterpenes under the base model). The grey areas denote nighttime.

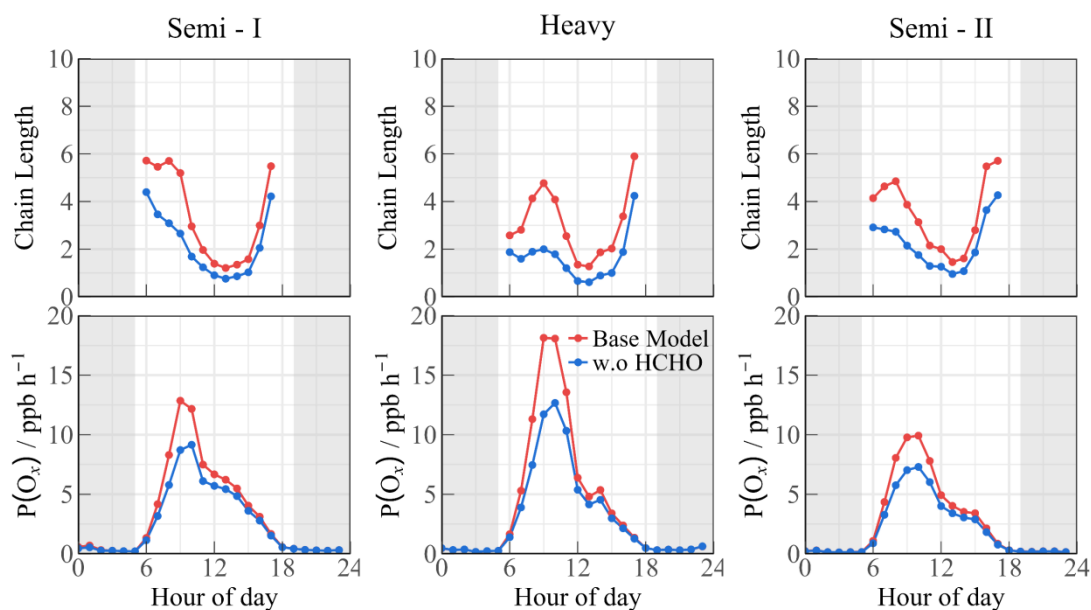

**Fig. S8.** The relationship between radical cycling and ozone pollution is established through chain length (ChL) and ozone production rate ( $P(O_x)$ ). To test the influence of HCHO, its concentration was both constrained and unconstrained. The grey areas indicate nighttime periods.

## Tables in supplementary material

**Table.S1.** Detailed information of supporting measurements.

| Species                  | Methods      | limit of detection                | Accuracy (1 $\sigma$ ) | Time resolution |
|--------------------------|--------------|-----------------------------------|------------------------|-----------------|
| <b>OH</b>                | LIF          | $3.3 \times 10^5 \text{ cm}^{-3}$ | $\pm 13\%$             | 60s             |
| <b>HO<sub>2</sub></b>    | LIF          | $1.1 \times 10^6 \text{ cm}^{-3}$ | $\pm 17\%$             | 60s             |
| <b>RO<sub>2</sub></b>    | LIF          | $2.6 \times 10^6 \text{ cm}^{-3}$ | $\pm 21\%$             | 60s             |
| <b>k<sub>OH</sub></b>    | LP-LIF       | $0.3 \text{ s}^{-1}$              | $\pm 20\%$             | 180s            |
| <b>Temperature</b>       | Met One 083E | -50 to 50 °C                      | $\pm 0.5\%$            | 60s             |
| <b>Relative humidity</b> | Met One 083E | 0 – 100%                          | $\pm 2.0\%$            | 60s             |
| <b>WS</b>                | Met One 014A | 0.45 – 60 m/s                     | $\pm 0.11 \text{ m/s}$ | 1min            |
| <b>WD</b>                | Met One 024A | 0–360° (>0.45 m/s)                | $\pm 5^\circ$          | 1min            |
| <b>Pressure</b>          | Met One 092  | 600–1100 hPa                      | $\pm 0.5\%$            | 60s             |
| <b>J-values</b>          | SR           | -                                 | $\pm 10\%$             | 60s             |
| <b>PM<sub>2.5</sub></b>  | TEOM         | $0.1 \mu\text{g}/\text{m}^3$      | $\pm 10\%$             | 1h              |
| <b>O<sub>3</sub></b>     | UV           | 0.5 ppb                           | $\pm 10\%$             | 60s             |
|                          | UV           | 0.4 ppb                           | $\pm 10\%$             | 60s             |
| <b>NO</b>                | CL           | 50 ppt                            | $\pm 10\%$             | 60s             |
| <b>NO<sub>2</sub></b>    | CL           | 50 ppt                            | $\pm 10\%$             | 60s             |
| <b>SO<sub>2</sub></b>    | UV-F         | 0.1 ppb                           | $\pm 10\%$             | 60s             |
| <b>CO</b>                | NDIR         | 50 ppb                            | $\pm 10\%$             | 60s             |
|                          | CRDS         | 15 ppb                            | $\pm 10\%$             | 60s             |
| <b>PAN</b>               | GC-ECD       | 50 ppt                            | $\pm 10\%$             | 60s             |
| <b>HONO</b>              | CEAS         | 150 ppt                           | $\pm 15\%$             | 60s             |
| <b>HCHO</b>              | Hantzsch     | 200 ppt                           | $\pm 5\%$              | 60s             |
| <b>NMHCs</b>             | GC-MS/FID    | 5–70 ppt                          | $\pm 10\text{--}15\%$  | 1h              |
