# Supplementary material for: Accurate Elucidation of Oxidation Under Heavy Ozone Pollution: A Full Suite of Radical Measurement In the Chemical-complex Atmosphere
Source: Copernicus journal article supplement (doi:10.5194/egusphere-2024-2494), 2024-08-30
Supplement: Supplementary file [file egusphere-2024-2494-AC3-supplement.pdf]

Dear Editor Eleanor Browne and Referee,

Thanks for your suggestions which significantly help us to improve the manuscript. Hereby, we submit our responses and the manuscript has been revised accordingly. If there are any further questions or comments, please let us know.

Best regards

Guoxian Zhang on behalf of all co-authors

Key Lab. of Environmental Optics & Technology, Anhui Institute of Optics and Fine Mechanics, Chinese Academy of Sciences

230031 Hefei China

E-mail: [gxzhang@aiofm.ac.cn](mailto:gxzhang@aiofm.ac.cn)

## Major Comments

---

*1. The authors did not conduct any testing for potential interferences associated with their OH measurements. While it is clear that some LIF-FAGE instruments are more sensitive to interferences than others, testing for interferences is still important, especially in complex chemical environments given that the source(s) of the interference have yet to be identified. The authors should acknowledge the possibility that unknown interferences may have contributed to their OH measurements and may explain some of the discrepancy with their model. It is unfortunate that the authors did not conduct interference testing during the “heavy” pollution episode. This would have provided confidence that the elevated OH concentrations during this period were free from interferences.*

### **Reply:**

Thanks for your suggestion. During the TROPSTECT-YRD campaign, we did not use an inlet-pre-injector to determine the chemical background of OH radical. We acknowledge your point that the comparison exercise with a second LIF instrument at a different location does not ensure that the instrument (and the OH measurement presented here) is free from interferences. We will discuss whether internal interference exists in AIOFM-LIF from the following aspects:

First of all, literature research shows that measurement interference is more related to the length of the inlet in the low-pressure cell (Griffith et al., 2016). In terms of system design, the AIOFM-LIF system uses a short-length inlet design to minimize this and other unknown disturbances (the distance from radical sampling to fluorescence excitation is ~150 mm).

Additionally, potential interference may exist when the atmosphere contains abundant alkenes, ozone, and BVOCs, indicating that environmental conditions play leading roles in OH interferences (Mao et al., 2010; Fuchs et al., 2016; Novelli et al., 2014). In the previous comparison exercise with a LIF instrument deployed an inlet pre-injector (PKU-LIF), the ozonolysis interference on the measurement consistency

of both systems was excluded under high-VOCs conditions (Zhang et al., 2022).

We have compared the chemical conditions during the intercomparison experiment and the current environmental conditions. Overall, the key parameters related to ozonolysis reactions ( $O_3$ , alkenes, isoprene and  $NO_x$ ) in TROPSTECT-YRD were similar to those during the comparison experiment, which is not conducive to generating potential OH interference.

**Table.** Comparison of key parameters related to ozonolysis reactions ( $O_3$ , alkenes, isoprene and  $NO_x$ ) between TROPSTECT-YRD and the intercomparison experiment. All the values are the diurnal average (10:00-15:00).

| Species        | Intercomparison | TROPSTECT-YRD |
|----------------|-----------------|---------------|
| $O_3$ (ppb)    | 71.02           | 76.25         |
| Alkenes (ppb)  | 1.29            | 0.67          |
| Isoprene (ppb) | 0.67            | 0.86          |
| $NO_x$ (ppb)   | 5.65            | 6.55          |

To provide direct evidence on the OH chemical background signal, we conducted another atmospheric oxidation observation in the same location (Science Island background station in Hefei) and season (September, Autumn in 2022) in 2022, using chemical modulation methods to measure the chemical background of OH radicals in AIOFM-LIF instrument. The environmental conditions during ozone pollution (2022.9.29-2022.10.3) are shown in the Fig. S3, with daytime peaks of ozone concentration above 75 ppb, accompanied by alkene species approaching ~10 ppb. The diurnal concentration of isoprene was also a high level (>1 ppb). The chemical conditions are more favourable to induce OH interference than the TROPSTECT-YRD site. However, the OH concentrations achieved by chemical modulation ( $OH_{chem}$ ) and wavelength modulation ( $OH_{wav}$ ) were in good agreement. No obvious chemical background was observed by deploying an inlet pre-injector. Therefore, it is not expected that OH measurement in the present study was affected by internal interference.

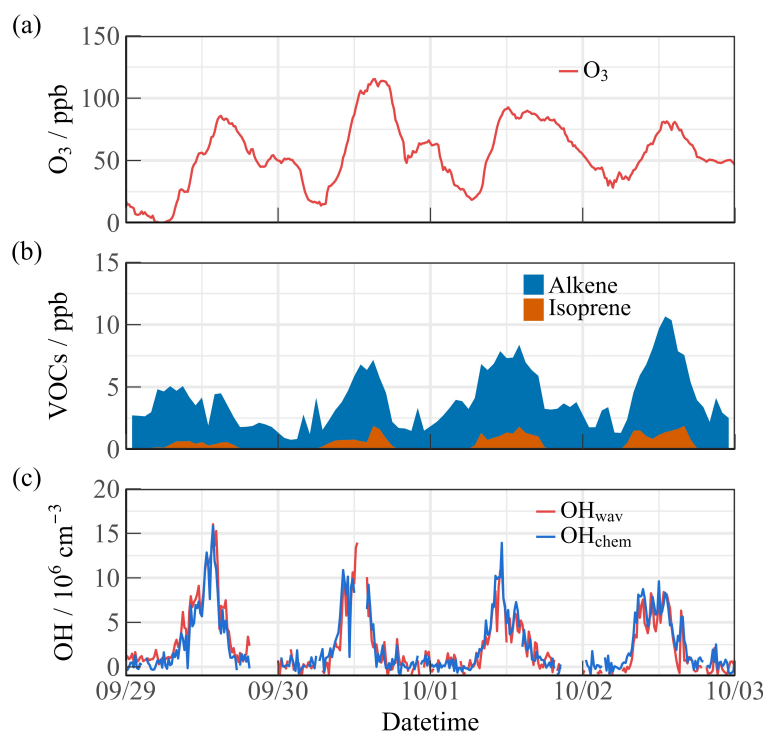

**Fig. S3.** Results of an additional atmospheric oxidation observation experiment in the same location and season in 2022. **(a)** Ozone concentration **(b)** Concentrations of alkene and isoprene, respectively. **(c)** The OH concentrations achieved by chemical modulation ( $OH_{chem}$ ) and wavelength modulation ( $OH_{wav}$ ).

We added the detailed description in Line 187-197.

### Revision:

**Line 187-197:** An additional atmospheric oxidation observation was conducted in the same location and season in 2022 with a chemical modulation method to determine the chemical background of OH radicals (Fig. S3). During the ozone pollution (2022.9.29-2022.10.3), the daytime peaks of ozone concentration above 75 ppb, accompanied by alkene species approaching ~10 ppb. The diurnal concentration of isoprene was also a high level (>1 ppb). The chemical conditions are more favourable to induce OH interference than in the TROPSTECT campaign, while the OH concentrations achieved by chemical modulation ( $OH_{chem}$ ) and wavelength modulation ( $OH_{wav}$ ) were in good agreement. No obvious chemical background was observed by deploying an inlet pre-injector. Therefore, it is not expected that OH measurement in the present study was affected by internal interference.

*2. There is very little discussion of the OH reactivity measurements. Figure 4 shows the measured reactivity with that calculated from major OH sinks, but it*

*isn't clear whether these are the measured OH sinks or whether they include the reactivity of unmeasured modeled oxidation products. During the "heavy" pollution episode, the calculated reactivity appears to be higher than that during the "semi" periods, while the measured reactivity appears to be similar. Given that the greatest discrepancy between the radical measurements and the model occurred during the "heavy" episode, the modeled OH reactivity (including the reactivity of unmeasured modeled oxidation products) should be discussed in much more detail.*

**Reply:**

Thanks for your suggestion. First, we provided a detailed description of the  $k_{OH}$  measurement instruments and listed the VOCs involved in the model simulations in Table S3.

**Table.S3.** The comprehensive list of model constraints.

| Categories  | Species                                                                                                                                                                                                                                                                                                                                                                                                                                                               |
|-------------|-----------------------------------------------------------------------------------------------------------------------------------------------------------------------------------------------------------------------------------------------------------------------------------------------------------------------------------------------------------------------------------------------------------------------------------------------------------------------|
| Meteorology | Temperature, Relative humidity, Pressure, Jvalues                                                                                                                                                                                                                                                                                                                                                                                                                     |
| Trace gases | O <sub>3</sub> , NO, NO <sub>2</sub> , SO <sub>2</sub> , CO, PAN, HONO                                                                                                                                                                                                                                                                                                                                                                                                |
| Alkanes     | methane, ethane, propane, n-butane, isobutane, cyclopentane, n-pentane, isopentane, cyclohexane, methyl cyclopentane, 2,3-dimethyl butane, 2,2-dimethyl butane, n-hexane, 2-methyl pentane, 3-methyl pentane, methyl cyclohexane, n-heptane, 2-methyl hexane, 2,3-dimethyl pentane, 2,4-dimethyl pentane, 3-methyl hexane, n-octane, 2,3,4-trimethyl pentane, 2-methyl heptane, 3-methyl heptane, 2,2,4-trimethyl pentane, n-nonane, n-decane, n-undecane, n-dodecane |
| Alkenes     | ethene, propene, 1,3-butadiene, 1-butene, cis-2-butene, trans-2-butene, 1-pentene, cis-2-pentene, trans-2-pentene, 1-hexene, styrene                                                                                                                                                                                                                                                                                                                                  |
| BVOCs       | isoprene                                                                                                                                                                                                                                                                                                                                                                                                                                                              |
| Alkynes     | acetylene                                                                                                                                                                                                                                                                                                                                                                                                                                                             |
| Aromatics   | benzene, toluene, ethyl benzene, o-xylene, m-xylene, n-propyl benzene, isopropyl benzene, p-ethyl toluene, o-ethyl toluene, m-ethyl toluene, 1,2,4-trimethyl benzene, 1,3,5-trimethyl benzene, 1,2,3-trimethyl benzene, p-diethyl benzene, m-diethyl benzene                                                                                                                                                                                                          |
| OVOCs       | HCHO, acetaldehyde, MACR, MVK                                                                                                                                                                                                                                                                                                                                                                                                                                         |

Accordingly, we detailed the contribution of OVOCs to OH reactivity and analyzed the reasons for the differences between calculated and observed values (Fig.4). In Fig. 4,  $k_{OVOCs}$  are categorized into three groups:  $k_{OVOCs(Obs)}$ ,  $k_{OVOCs(Model)}$ ,

and  $k_{\text{HCHO}}$ . Given the significance of formaldehyde photolysis, the contribution of HCHO to  $k_{\text{OVOCs}}$  is distinguished.  $k_{\text{OVOCs(Obs)}}$  encompasses species observed in addition to formaldehyde, such as acetaldehyde (ACD) and the oxidation products of isoprene (MACR and MVK). Intermediates generated by the model, including glyoxal (GLY), methylglyoxal (MGLY), higher aldehydes (ALD), ketones (KET), methyl ethyl ketone (MEK), and methanol (MOH), are classified as  $k_{\text{OVOCs(Model)}}$ . Upon considering  $k_{\text{OVOCs(Model)}}$ , the calculated reactivity seems to compare well with the observed OH reactivity at the start of the measurement period, but then there is evidence of missing OH reactivity after September 10th (Fig.4(d)).

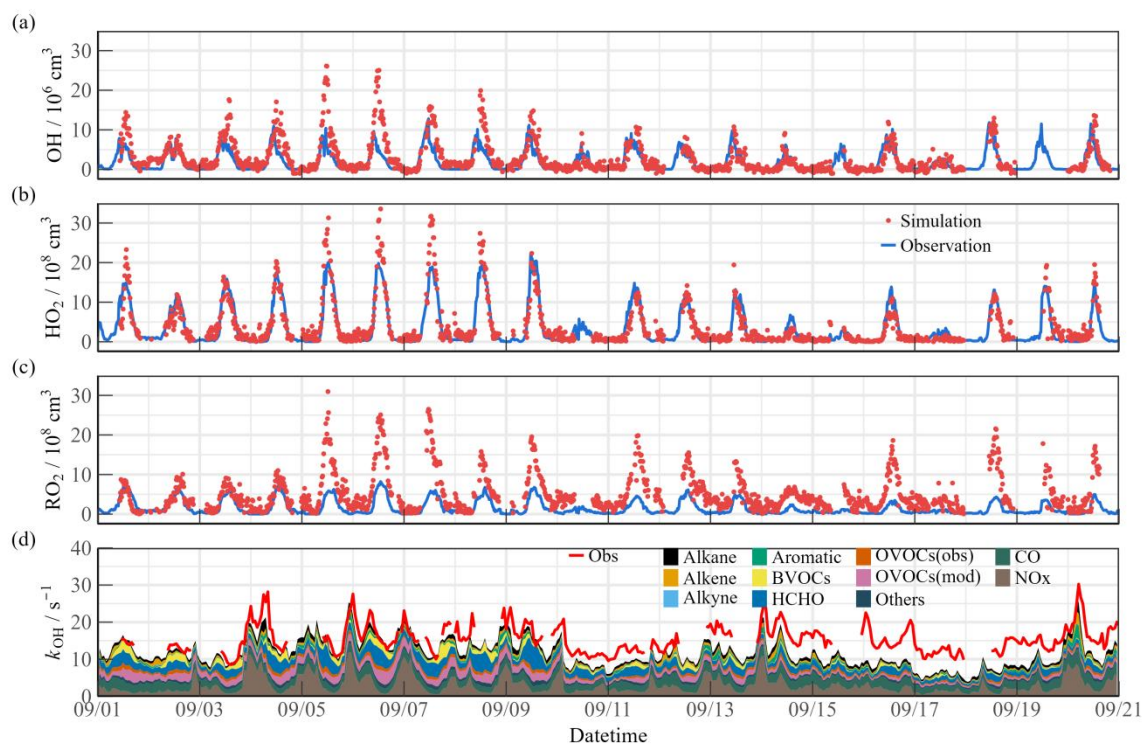

**Fig. 4.** Timeseries of the observed and modelled parameters for OH, HO<sub>2</sub> and  $k_{\text{OH}}$  during the observation period. **(a)** OH, **(b)** HO<sub>2</sub>, **(c)**  $k_{\text{OH}}$ .

Due to the limitations of available instruments, this observation only measured a limited number of OVOCs species, making it difficult to accurately quantify the contribution of larger aldehydes and ketones, carboxylic acids, nitrophenols, and other multifunctional species to  $k_{\text{OH}}$  (Wang et al., 2024). Since the MCM mechanism considers more secondary formation reactions than the RACM2 mechanism, it can qualitatively assess the photochemical role of unmeasured OVOCs species in the atmosphere (Wang et al., 2022). The additional modeled OVOCs by the MCM v3.3.1

mechanism contributed  $\sim 2.4 \text{ s}^{-1}$  to the missing OH reactivity (Fig.S6). During Heavy period, the reactivity of more model oxidation products increased the daytime  $k_{\text{OH}}$  by about  $5.1 \text{ s}^{-1}$ . Therefore, the observed  $k_{\text{OH}}$  can serve as an upper limit for sensitivity tests, thereby the full suite of radical measurement can be performed to explore the missing oxidation properties and ozone formation (Section 4.1).

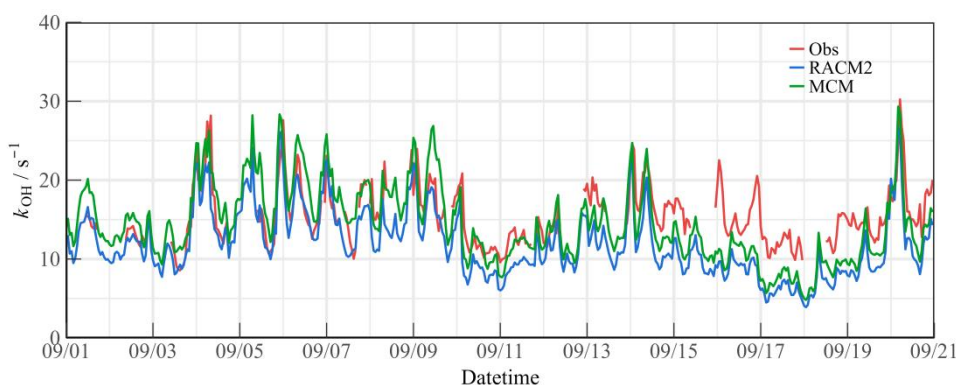

Fig. S7. Timeseries of the observed and modelled  $k_{\text{OH}}$  during the observation period.

We added the detailed description in Line 345-353&372-386.

#### Revision:

**Line 345-353:**  $k_{\text{OVOCs}}$  are categorized into three groups:  $k_{\text{OVOCs(Obs)}}$ ,  $k_{\text{OVOCs(Model)}}$ , and  $k_{\text{HCHO}}$ . Given the significance of formaldehyde photolysis, the contribution of HCHO to  $k_{\text{OVOCs}}$  is distinguished.  $k_{\text{OVOCs(Obs)}}$  encompasses species observed in addition to formaldehyde, such as acetaldehyde (ACD) and the oxidation products of isoprene (MACR and MVK). Intermediates generated by the model, including glyoxal (GLY), methylglyoxal (MGLY), higher aldehydes (ALD), ketones (KET), methyl ethyl ketone (MEK), and methanol (MOH), are classified as  $k_{\text{OVOCs(Model)}}$ . Upon considering  $k_{\text{OVOCs(Model)}}$ , the reactivity calculated prior to September 10th aligns quite well with the observed OH reactivity.

**Line 372-386:** The calculated reactivity seems to compare well with the observed OH reactivity at the start of the measurement period, but then there is evidence of missing OH reactivity after September 10th (Fig. 4(d)). Due to the limitations of available instruments, this observation only measured a limited number of OVOCs species, making it difficult to accurately quantify the contribution of larger aldehydes and ketones, carboxylic acids, nitrophenols, and other multifunctional species to  $k_{\text{OH}}$

(Wang et al., 2024). Since the MCM mechanism considers more secondary formation reactions than the RACM2 mechanism, it can qualitatively assess the photochemical role of unmeasured OVOCs species in the atmosphere (Wang et al., 2022). The additional modeled OVOCs by the MCM v3.3.1 mechanism contributed  $\sim 2.4 \text{ s}^{-1}$  to the missing OH reactivity (Fig. S7). During Heavy period, the reactivity of more model oxidation products increased the daytime  $k_{\text{OH}}$  by about  $5.1 \text{ s}^{-1}$ . Therefore, the observed  $k_{\text{OH}}$  can serve as an upper limit for sensitivity tests, thereby the full suite of radical measurement can be performed to explore the missing oxidation properties and ozone formation (Section 4.1).

*3. As noted in the manuscript, there have been several studies where the “X mechanism” has been incorporated in order to explain the underprediction of the measured OH concentration by the model (Table 1). However, similar to these previous studies, the authors do not provide any new insight on what “X” might be. Some of these authors have recently published a theoretical study suggesting that reactive aldehyde chemistry may explain the missing source of OH (Yang et al., Nature Communications, 15, 1648 (2024). <https://doi.org/10.1038/s41467-024-45885-w>). Incorporation of this proposed mechanism into their model would provide some new insights into the potential missing radical chemistry and provide a test of whether the proposed mechanism can explain the measured radical concentrations during the heavy pollution episode.*

**Reply:**

Thank you for your review and valuable comments on this manuscript. We agree with your perspective on species X, considering that it currently serves more as a fitting parameter, which may offer limited assistance in understanding the underlying mechanisms. Therefore, in this revision, we have followed your advice and added the Higher Aldehyde Mechanism to test whether it can explain the discrepancy between measured and simulated radical concentrations. The results indicate that the



contribution of the HAM mechanism to OH radicals in different episodes ranged between 4.4% - 6.0%, while the concentrations of HO<sub>2</sub> and RO<sub>2</sub> radicals increased by approximately 7.4% and 12.5%, respectively.

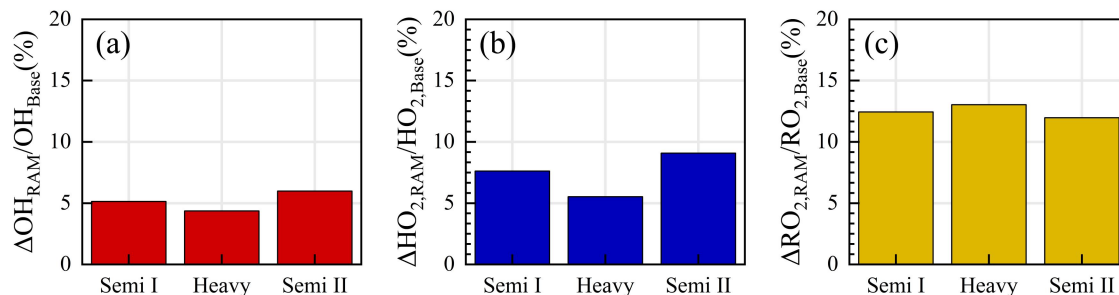

**Fig. 7.** The response of (a) OH, (b) HO<sub>2</sub> and (c) RO<sub>2</sub> radicals to the Higher Aldehyde Mechanism (HAM) in different episodes (Semi I, Heavy, and Semi II) in diurnal time (10:00-15:00).

Additionally, we combine the missing aldehyde primary emissions and the HAM mechanism under the entire photochemical spectrum to qualitatively assess the impact on RO<sub>2</sub> radical concentrations. Notably, RO<sub>2</sub> radical concentrations exhibit a pronounced sensitivity to autoxidation, with the incorporation of additional OVOCs potentially boosting simulated RO<sub>2</sub> radical concentrations by 20% to 40%. Consequently, although limiting formaldehyde can partially offset the HO<sub>2</sub> radical cycle and enhance the precision of HOx radical chemistry studies, additional measurements should be undertaken for other OVOCs, coupled with the deployment of full-chain radical detection systems, to accurately elucidate the oxidation processes under severe ozone pollution conditions.

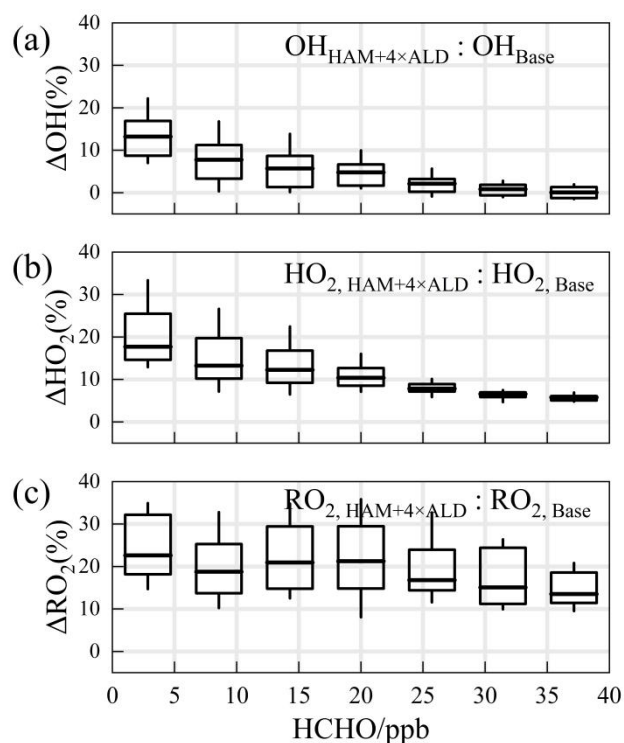

**Fig. S12.** The relationship between the differences in the simulation of (a) OH, (b) HO<sub>2</sub>, and (c) RO<sub>2</sub> radical concentrations by HAM mechanism and the base scenario across the entire photochemical spectrum. An empirical hypothesis is proposed to amplify the concentration of higher-order aldehydes by a factor of about 4, which is the proportion of formaldehyde concentration underestimated by the model. The boxplots represent the 10%, 25%, median, 75%, and 90% of the data, respectively.

### Revision:

**Line 508-518:** Missing OH sources are closely related to the chemistry of OVOCs (Yang et al., 2024a; Qu et al., 2021). Reactive aldehyde chemistry, particularly the autoxidation of carbonyl organic peroxy radicals (R(CO)O<sub>2</sub>) derived from higher aldehydes, is a significant OH regeneration mechanism that has been shown to contribute importantly to OH sources in regions with abundant natural and anthropogenic emissions during warm seasons (Yang et al., 2024b). In this study, the higher aldehyde mechanism (HAM) by Yang et al was parameterized into the base model to test new insights into the potential missing radical chemistry (Fig. 7). The results indicate that the contribution of the HAM mechanism to OH radicals in different episodes ranged between 4.4% - 6.0%, while the concentrations of HO<sub>2</sub> and RO<sub>2</sub> radicals increased by approximately 7.4% and 12.5%, respectively.

**Line 556-569:** Higher aldehyde chemistry is a concrete manifestation of verifying the aforementioned hypothesis for RO<sub>2</sub> sources (Yang et al., 2024b). The autoxidation

process of  $R(CO)O_2$ , encompasses a hydrogen migration process that transforms it into the  $\cdot OOR(CO)OOH$  radical (Wang et al., 2019). This radical subsequently reacts with  $NO$  to yield the  $\cdot OR(CO)OOH$  radical. The  $\cdot OR(CO)OOH$  radical predominantly undergoes two successive rapid hydrogen migration reactions, ultimately resulting in the formation of  $HO_2$  radicals and hydroperoxy carbonyl (HPC). Consequently, the HAM mechanism extends the lifetime of the  $RO_2$  radical, providing a valuable complement to the unaccounted sources of  $RO_2$  radicals. As depicted in Fig. 7, the incorporation of the HAM mechanism results in an approximate 7.4% and 12.5% increase in the concentrations of  $HO_2$  and  $RO_2$  radicals, respectively. It is important to note that the total concentrations of primary emitted aldehydes and the HPC group may be underestimated, which could lead to the aforementioned analysis being conservative in nature. Further exploration of the unaccounted sources of  $RO_2$  radicals will be presented in Section 4.3.

**Line 682-712:** The reasons for the discrepancy between simulated and observed values for ozone production deserve further investigation. As depicted in Fig. 11(c), the simulated  $HO_2/RO_2$  ratios display a robust positive correlation with photochemical activity, fluctuating between 2 and 4. A notable feature during severe ozone pollution is the intense distribution of formaldehyde, with an average concentration of  $21.81 \pm 4.57$  ppb (11:00 – 13:00). While formaldehyde acts as a precursor for  $HO_2$  radicals, it does not directly generate  $RO_2$  radicals. The contributions of OVOCs to the  $RO_x$  radical do not exhibit the same intensity as formaldehyde, and the current mechanism encounters difficulties in replicating formaldehyde concentrations (Fig. S11). The simulation of formaldehyde concentrations using the MCM v3.3.1 mechanism has shown improvement, indicating that the secondary formation of unmeasured species, such as OVOCs, will feedback on  $RO_2$  radical levels. When formaldehyde levels are unconstrained, the simulated  $HO_2/RO_2$  ratios align with observations, suggesting that under the prevailing chemical mechanism, the photochemical efficiency of formaldehyde and other OVOCs is similar. Therefore, an empirical hypothesis is proposed to amplify the concentration of higher-order aldehydes by a factor of about 4, which is the proportion of formaldehyde concentration underestimated by the model.

The qualitative assessment of the impact of missing aldehyde primary emissions on RO<sub>2</sub> radical concentrations was combined with the HAM mechanism across the entire photochemical spectrum (Fig.S12). Enhanced impact of aldehyde autoxidation in the presence of weak photochemical conditions could alter the simulated levels of OH and HO<sub>2</sub> radicals by approximately 13.9% and 18.1%, respectively. However, higher ALD concentrations will be achieved under intensive photochemical conditions, leading to the gradual dominance of the sink channels for OH + OVOCs, with the effect of autoxidation mechanisms gradually decreasing. RO<sub>2</sub> radical concentrations is notably more sensitive to the HAM mechanism, where incorporates additional OVOCs, can enhance the simulation of RO<sub>2</sub> radical concentrations by 20 - 40%. Consequently, although limiting formaldehyde can partially offset the HO<sub>2</sub> radical cycle and enhance the precision of HOx radical chemistry studies, additional measurements should be undertaken for other OVOCs, coupled with the deployment of full-chain radical detection systems, to accurately elucidate the oxidation processes under severe ozone pollution conditions.

*4. The final section of the paper is very confusing. The authors appear to suggest that the base model constrained to the measured formaldehyde overestimates the HO<sub>2</sub>/RO<sub>2</sub> ratio by increasing the production of HO<sub>2</sub> relative to RO<sub>2</sub>. However, unconstraining the model to the formaldehyde concentrations results in lower HO<sub>2</sub>/RO<sub>2</sub> ratios that are in better agreement with the measured ratio, presumably because the model underestimates the measured formaldehyde. However, including monoterpene chemistry that have multiple RO<sub>2</sub> isomerization steps increases the modeled RO<sub>2</sub> concentration so that the modeled HO<sub>2</sub>/RO<sub>2</sub> ratio is in better agreement with the measurements when HCHO is constrained. The authors suggest that additional measurements of OVOCs are necessary, but the connection between unmeasured OVOCs and the different model scenarios discussed in this section is not clear. This section of the manuscript needs considerable revision in order to clarify the points that the*

*authors are trying to make.*

**Reply:**

Thank you for your response. We acknowledge your point that the final section of the paper is very confusing. We wish to elaborate on a phenomenon in the manuscript, which is that formaldehyde has a high concentration distribution (average noon concentration of  $21.81 \pm 4.57$  ppb), but OVOCs do not show the same intensity in contributing to RO<sub>x</sub> radicals as formaldehyde does. The current mechanism is having difficulty replicating the concentration of formaldehyde. Therefore, we have changed the title of the relevant section to "4.3 Missing OVOCs sources influence ozone production" and adjusted the content of that section. We have removed the impact of formaldehyde on the length of the reaction chain and its oxidizing effect, focusing more on the diagnostic of the HO<sub>2</sub>/RO<sub>2</sub> ratio on ozone formation to improve the readability of the manuscript.

We also analyzed the impact of the missing OVOCs sources on RO<sub>2</sub> radicals and ozone production. When formaldehyde levels are unconstrained, the simulated HO<sub>2</sub>/RO<sub>2</sub> ratios align with observations, suggesting that under the prevailing chemical mechanism, the photochemical efficiency of formaldehyde and other OVOCs is similar. Therefore, an empirical hypothesis is proposed to amplify the concentration of higher-order aldehydes by a factor of about 4, which is the proportion of formaldehyde concentration underestimated by the model. The qualitative assessment of the impact of missing aldehyde primary emissions on RO<sub>2</sub> radical concentrations was combined with the HAM mechanism across the entire photochemical spectrum (Fig.S12). Enhanced impact of aldehyde autoxidation in the presence of weak photochemical conditions could alter the simulated levels of OH and HO<sub>2</sub> radicals by approximately 13.9% and 18.1%, respectively. However, higher ALD concentrations will be achieved under intensive photochemical conditions, leading to the gradual dominance of the sink channels for OH + OVOCs, with the effect of autoxidation mechanisms gradually decreasing. RO<sub>2</sub> radical concentrations is notably more sensitive to the HAM mechanism, where incorporates additional OVOCs, can enhance the simulation of RO<sub>2</sub> radical concentrations by 20 - 40%.

We added the detailed description in Line 661-712.

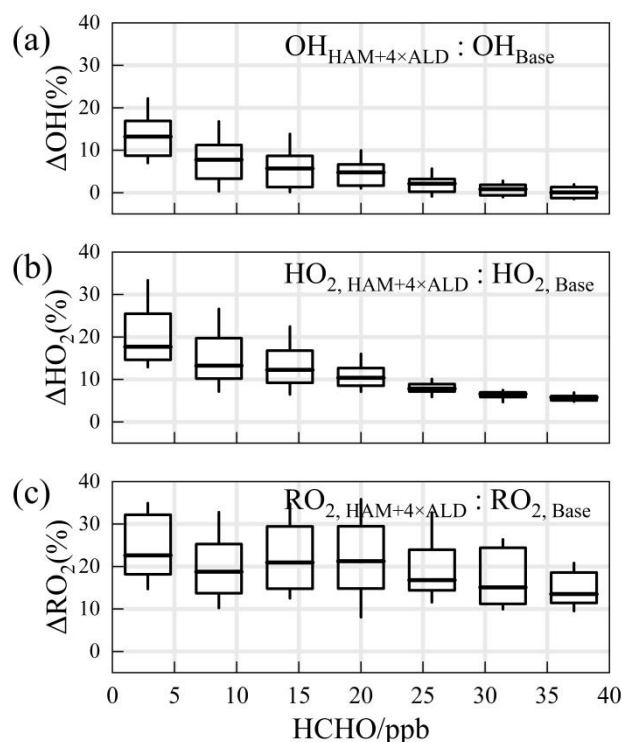

**Fig. S12.** The relationship between the differences in the simulation of (a) OH, (b) HO<sub>2</sub>, and (c) RO<sub>2</sub> radical concentrations by HAM mechanism and the base scenario across the entire photochemical spectrum. An empirical hypothesis is proposed to amplify the concentration of higher-order aldehydes by a factor of about 4, which is the proportion of formaldehyde concentration underestimated by the model. The boxplots represent the 10%, 25%, median, 75%, and 90% of the data, respectively.

### Revision:

**Line 660:** 4.3 Missing OVOCs sources influence ozone production

**Line 661-712:** The consistency between model predictions and observed measurements for ozone production, akin to the concentration ratio of HO<sub>2</sub>/RO<sub>2</sub>, is depicted in Fig. 11(a)(b). In areas with low NO levels, the ratio of modeled to actual ozone production ranges from 0.5 to 2, with the exception of the ClearfLo and AIRPRO-summer datasets (Woodward-Massey et al., 2023; Whalley et al., 2021). Conversely, under high NO conditions (with NO concentrations between 3 and 6 ppbv), the ozone production rate (P(Ox)) derived from measured radical concentrations typically exceeds that of the base model's predictions by more than threefold. Laboratory experiments focusing on the oxidation of representative VOCs suggest that ozone production can be enhanced by approximately 25% for the anthropogenic VOCs under investigation (Färber et al., 2024). The MTS+X scenario

represents an effort to enhance the congruence between modeled and measured radical concentrations. The incorporation of OVOCs and larger alkoxy radicals derived from monoterpenes has refined the model-measurement agreement for ozone formation under high NO conditions, reducing the discrepancy from 4.17 to 2.33. This substantiates the hypothesis of sensitivity analysis concerning ozone generation, as detailed in Section 4.2 and illustrated in Fig. S10.

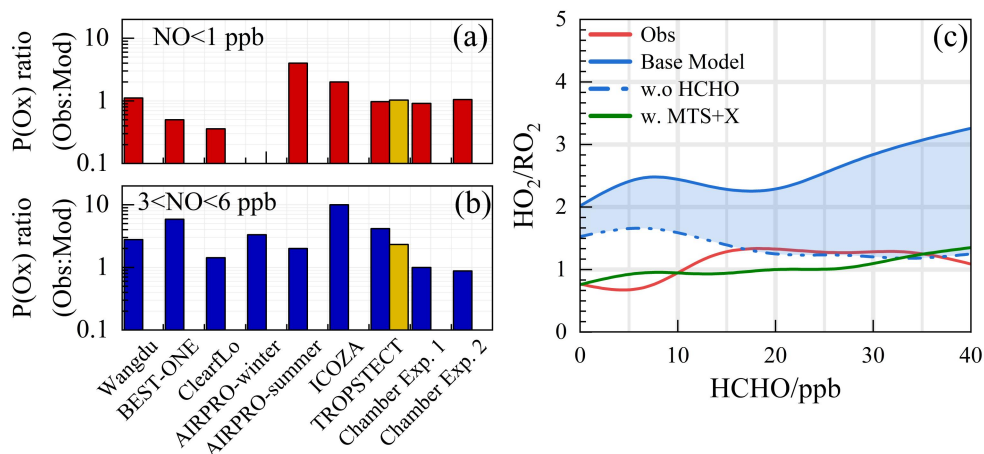

**Fig. 11.** Summary of the  $P(\text{Ox})_{\text{obs}}/P(\text{Ox})_{\text{Mod}}$  under (a) low-NO and (b) high-NO conditions. (c) The ratios for  $\text{HO}_2/\text{RO}_2$  show a correlation with HCHO levels. The blue shading represents the range of variation from constrained to unconstrained formaldehyde conditions. Chamber Exp. 1 and Chamber Exp. 2 denotes the parameters by single-step  $\text{HO}_2$  formation and multi-step  $\text{HO}_2$  formation determined in the chamber by (Färber et al., 2024).

The reasons for the discrepancy between simulated and observed values for ozone production deserve further investigation. As depicted in Fig. 11(c), the simulated  $\text{HO}_2/\text{RO}_2$  ratios display a robust positive correlation with photochemical activity, fluctuating between 2 and 4. A notable feature during severe ozone pollution is the intense distribution of formaldehyde, with an average concentration of  $21.81 \pm 4.57$  ppb (11:00 – 13:00). While formaldehyde acts as a precursor for  $\text{HO}_2$  radicals, it does not directly generate  $\text{RO}_2$  radicals. The contributions of OVOCs to the ROx radical do not exhibit the same intensity as formaldehyde, and the current mechanism encounters difficulties in replicating formaldehyde concentrations (Fig. S11). The simulation of formaldehyde concentrations using the MCM v3.3.1 mechanism has shown improvement, indicating that the secondary formation of unmeasured species, such as OVOCs, will feedback on  $\text{RO}_2$  radical levels. When formaldehyde levels are unconstrained, the simulated  $\text{HO}_2/\text{RO}_2$  ratios align with observations, suggesting that

under the prevailing chemical mechanism, the photochemical efficiency of formaldehyde and other OVOCs is similar. Therefore, an empirical hypothesis is proposed to amplify the concentration of higher-order aldehydes by a factor of about 4, which is the proportion of formaldehyde concentration underestimated by the model. The qualitative assessment of the impact of missing aldehyde primary emissions on RO<sub>2</sub> radical concentrations was combined with the HAM mechanism across the entire photochemical spectrum (Fig.S12). Enhanced impact of aldehyde autoxidation in the presence of weak photochemical conditions could alter the simulated levels of OH and HO<sub>2</sub> radicals by approximately 13.9% and 18.1%, respectively. However, higher ALD concentrations will be achieved under intensive photochemical conditions, leading to the gradual dominance of the sink channels for OH + OVOCs, with the effect of autoxidation mechanisms gradually decreasing. RO<sub>2</sub> radical concentrations is notably more sensitive to the HAM mechanism, where incorporates additional OVOCs, can enhance the simulation of RO<sub>2</sub> radical concentrations by 20 - 40%. Consequently, although limiting formaldehyde can partially offset the HO<sub>2</sub> radical cycle and enhance the precision of HO<sub>x</sub> radical chemistry studies, additional measurements should be undertaken for other OVOCs, coupled with the deployment of full-chain radical detection systems, to accurately elucidate the oxidation processes under severe ozone pollution conditions.



## References

---

- Färber, M., Fuchs, H., Bohn, B., Carlsson, P. T. M., Gkatzelis, G. I., Marcillo Lara, A. C., Rohrer, F., Vereecken, L., Wedel, S., Wahner, A., and Novelli, A.: Effect of the Alkoxy Radical Chemistry on the Ozone Formation from Anthropogenic Organic Compounds Investigated in Chamber Experiments, *ACS ES&T Air*, 1, 1096-1111, 10.1021/acsestair.4c00064, 2024.
- Fuchs, H., Tan, Z., Hofzumahaus, A., Broch, S., Dorn, H.-P., Holland, F., Kuenstler, C., Gomm, S., Rohrer, F., Schrade, S., Tillmann, R., and Wahner, A.: Investigation of potential interferences in the detection of atmospheric ROx radicals by laser-induced fluorescence under dark conditions, *Atmos Meas Tech*, 9, 1431-1447, 10.5194/amt-9-1431-2016, 2016.
- Griffith, S. M., Hansen, R. F., Dusanter, S., Michoud, V., Gilman, J. B., Kuster, W. C., Veres, P. R., Graus, M., de Gouw, J. A., Roberts, J., Young, C., Washenfelder, R., Brown, S. S., Thalman, R., Waxman, E., Volkamer, R., Tsai, C., Stutz, J., Flynn, J. H., Grossberg, N., Lefer, B., Alvarez, S. L., Rappenglueck, B., Mielke, L. H., Osthoff, H. D., and Stevens, P. S.: Measurements of hydroxyl and hydroperoxy radicals during CalNex-LA: Model comparisons and radical budgets, *J Geophys Res-Atmos*, 121, 4211-4232, 10.1002/2015jd024358, 2016.
- Mao, J., Ren, X., Chen, S., Brune, W. H., Chen, Z., Martinez, M., Harder, H., Lefer, B., Rappenglück, B., Flynn, J., and Leuchner, M.: Atmospheric oxidation capacity in the summer of Houston 2006: Comparison with summer measurements in other metropolitan studies, *Atmos Environ*, 44, 4107-4115, 10.1016/j.atmosenv.2009.01.013, 2010.
- Novelli, A., Hens, K., Ernest, C. T., Kubistin, D., Regelin, E., Elste, T., Plass-Duelmer, C., Martinez, M., Lelieveld, J., and Harder, H.: Characterisation of an inlet pre-injector laser-induced fluorescence instrument for the measurement of atmospheric hydroxyl radicals, *Atmos Meas Tech*, 7, 3413-3430, 10.5194/amt-7-3413-2014, 2014.
- Qu, H., Wang, Y., Zhang, R., Liu, X., Huey, L. G., Sjostedt, S., Zeng, L., Lu, K., Wu, Y., Shao, M., Hu, M., Tan, Z., Fuchs, H., Broch, S., Wahner, A., Zhu, T., and Zhang, Y.: Chemical Production of Oxygenated Volatile Organic Compounds Strongly Enhances Boundary-Layer Oxidation Chemistry and Ozone Production, *Environ Sci Technol*, 10.1021/acs.est.1c04489, 2021.
- Wang, S.-n., Wu, R.-r., and Wang, L.-m.: Role of Hydrogen Migrations in Carbonyl Peroxy Radicals in the Atmosphere, *Chinese J Chem Phys*, 32, 457-466, 10.1063/1674-0068/cjcp1811265, 2019.
- Wang, W., Yuan, B., Su, H., Cheng, Y., Qi, J., Wang, S., Song, W., Wang, X., Xue, C., Ma, C., Bao, F., Wang, H., Lou, S., and Shao, M.: A large role of missing volatile organic compound reactivity from anthropogenic emissions in ozone pollution regulation, *Atmos Chem Phys*, 24, 4017-4027, 10.5194/acp-24-4017-2024, 2024.
- Wang, W., Yuan, B., Peng, Y., Su, H., Cheng, Y., Yang, S., Wu, C., Qi, J., Bao, F., Huangfu, Y., Wang, C., Ye, C., Wang, Z., Wang, B., Wang, X., Song, W., Hu, W., Cheng, P., Zhu, M., Zheng, J., and Shao, M.: Direct observations indicate photodegradable oxygenated volatile organic compounds (OVOCs) as larger contributors to radicals and ozone production in the atmosphere, *Atmos Chem Phys*, 22, 4117-4128, 10.5194/acp-22-4117-2022, 2022.
- Whalley, L. K., Slater, E. J., Woodward-Massey, R., Ye, C., Lee, J. D., Squires, F., Hopkins, J. R., Dunmore, R. E., Shaw, M., Hamilton, J. F., Lewis, A. C., Mehra, A., Worrall, S. D., Bacak, A., Bannan, T. J., Coe, H., Percival, C. J., Ouyang, B., Jones, R. L., Crilley, L. R., Kramer, L. J., Bloss, W. J., Vu, T., Kotthaus, S., Grimmond, S., Sun, Y., Xu, W., Yue, S., Ren, L., Acton, W. J. F., Hewitt, C. N., Wang, X.,

Fu, P., and Heard, D. E.: Evaluating the sensitivity of radical chemistry and ozone formation to ambient VOCs and NO<sub>x</sub> in Beijing, *Atmos Chem Phys*, 21, 2125-2147, 10.5194/acp-21-2125-2021, 2021.

Woodward-Massey, R., Sommariva, R., Whalley, L. K., Cryer, D. R., Ingham, T., Bloss, W. J., Ball, S. M., Cox, S., Lee, J. D., Reed, C. P., Crilley, L. R., Kramer, L. J., Bandy, B. J., Forster, G. L., Reeves, C. E., Monks, P. S., and Heard, D. E.: Radical chemistry and ozone production at a UK coastal receptor site, *Atmos Chem Phys*, 23, 14393-14424, 10.5194/acp-23-14393-2023, 2023.

Yang, X., Li, Y., Ma, X., Tan, Z., Lu, K., and Zhang, Y.: Unclassical Radical Generation Mechanisms in the Troposphere: A Review, *Environ Sci Technol*, 10.1021/acs.est.4c00742, 2024a.

Yang, X., Wang, H., Lu, K., Ma, X., Tan, Z., Long, B., Chen, X., Li, C., Zhai, T., Li, Y., Qu, K., Xia, Y., Zhang, Y., Li, X., Chen, S., Dong, H., Zeng, L., and Zhang, Y.: Reactive aldehyde chemistry explains the missing source of hydroxyl radicals, *Nat Commun*, 15, 1648, 10.1038/s41467-024-45885-w, 2024b.

Zhang, G., Hu, R., Xie, P., Lu, K., Lou, S., Liu, X., Li, X., Wang, F., Wang, Y., Yang, X., Cai, H., Wang, Y., and Liu, W.: Intercomparison of OH radical measurement in a complex atmosphere in Chengdu, China, *Sci Total Environ*, 155924, 10.1016/j.scitotenv.2022.155924, 2022.
